# Supplementary material
Source: PubMed Central journal article supplement (PMC6484417)
Supplement: EMBJ-38-e100730-s005.pdf [file EMBJ-38-e100730-s005.pdf]

# Figure 5A

whole cell lysate

HOIP

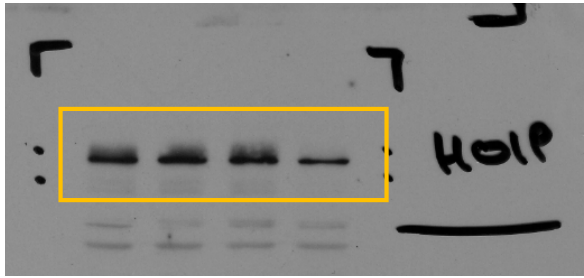

OTULIN

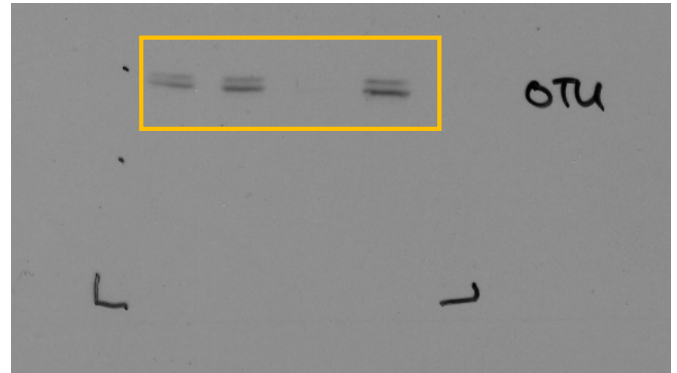

actin

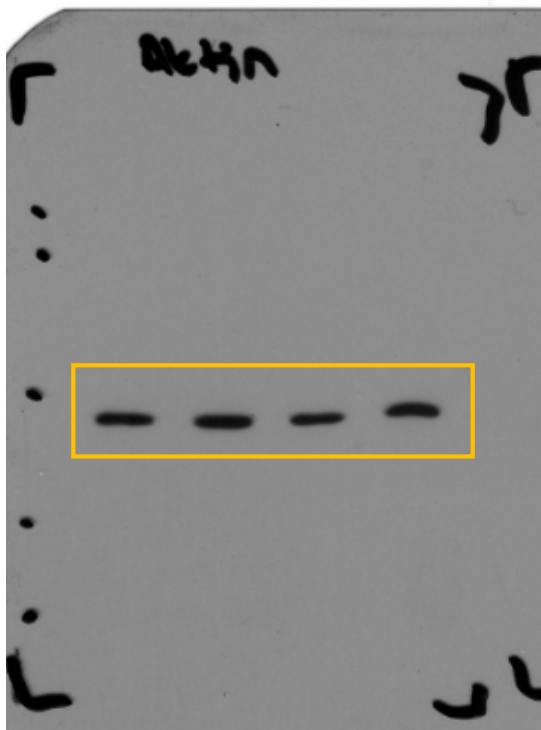

Htt (HA-Tag)

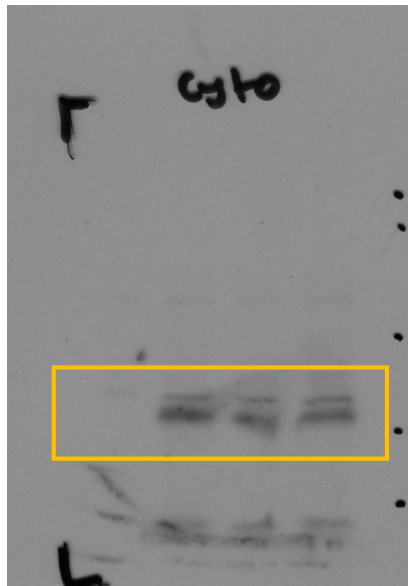

GFP

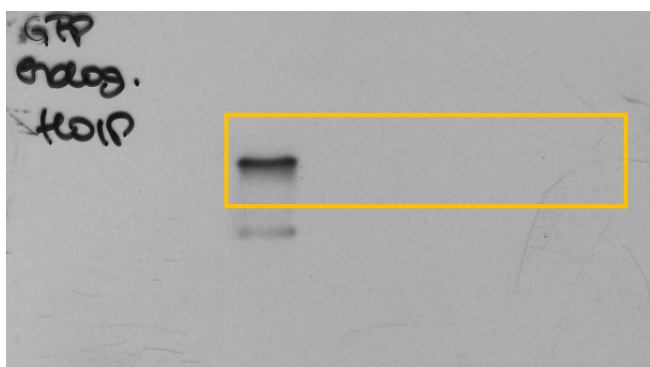

Figure 5A

IP

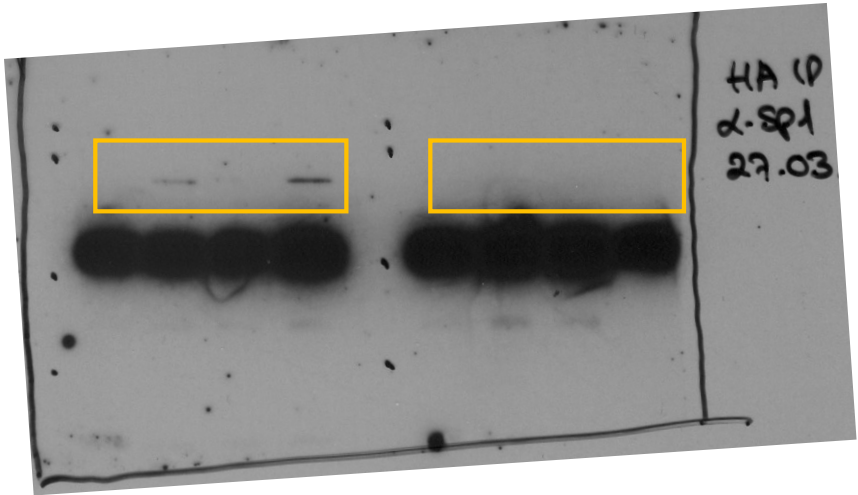

input

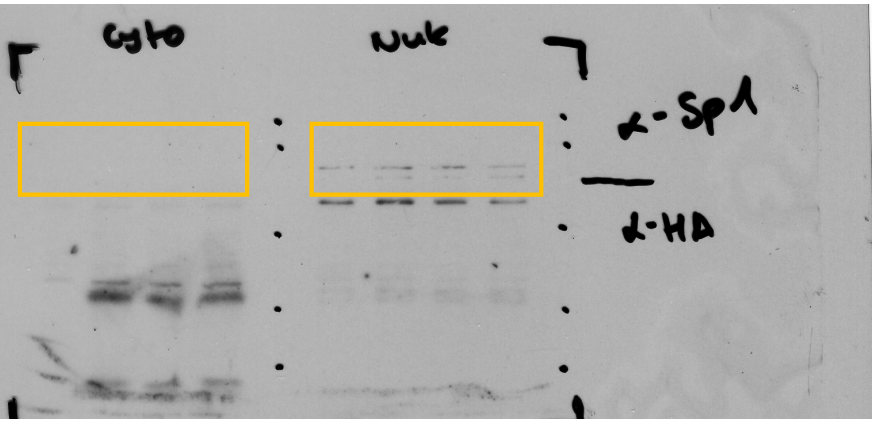

HNRNPL

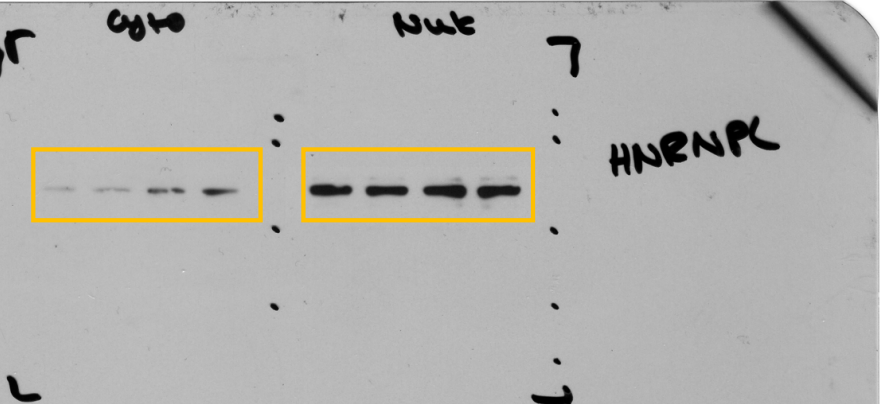

GAPDH

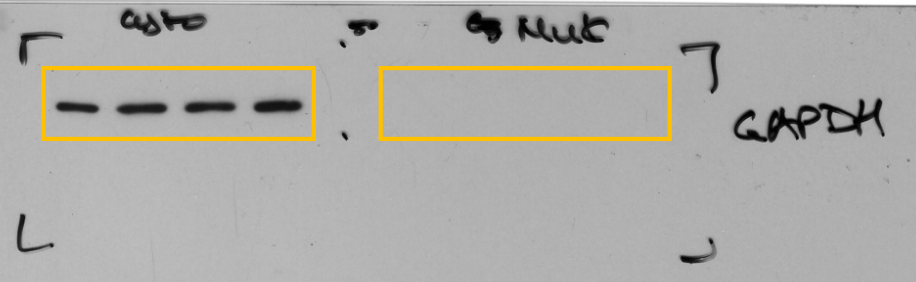

Figure 5C

Htt

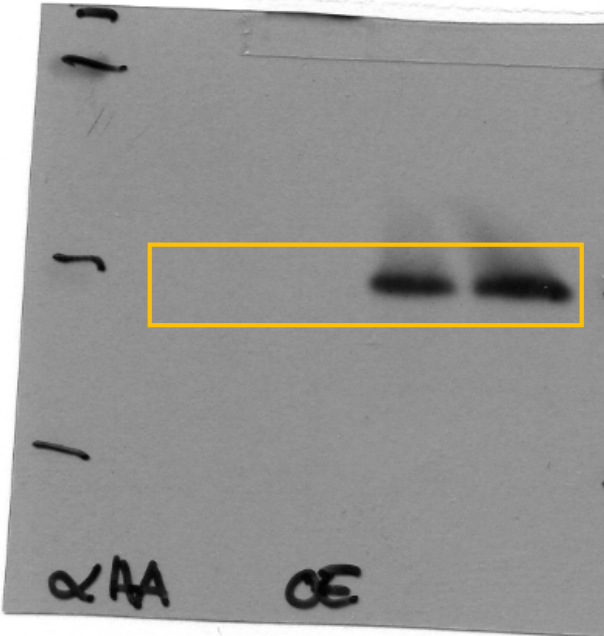

HOIP

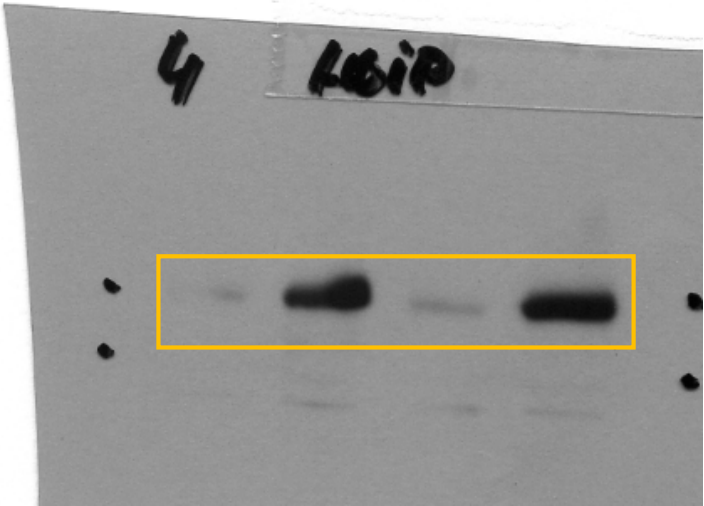

actin

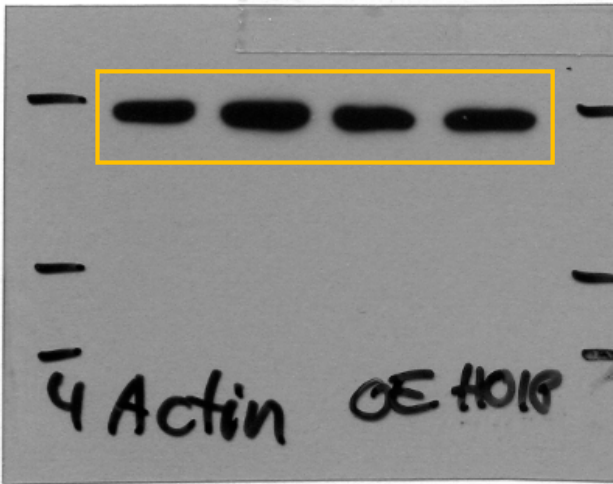

Figure 5D

HOIP

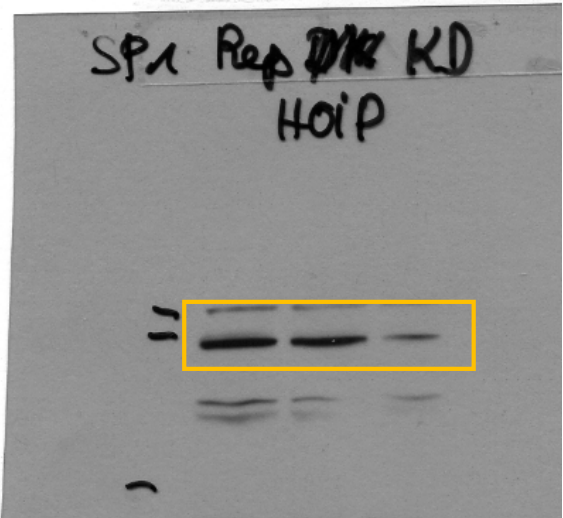

Htt (HA-TAG)

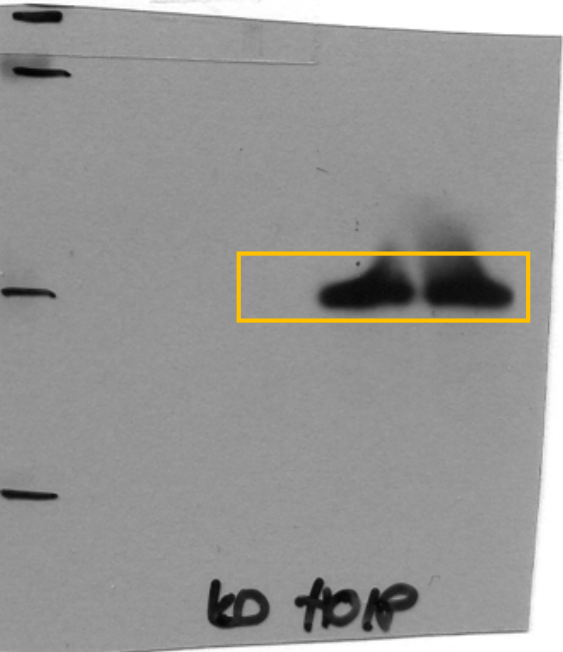

actin

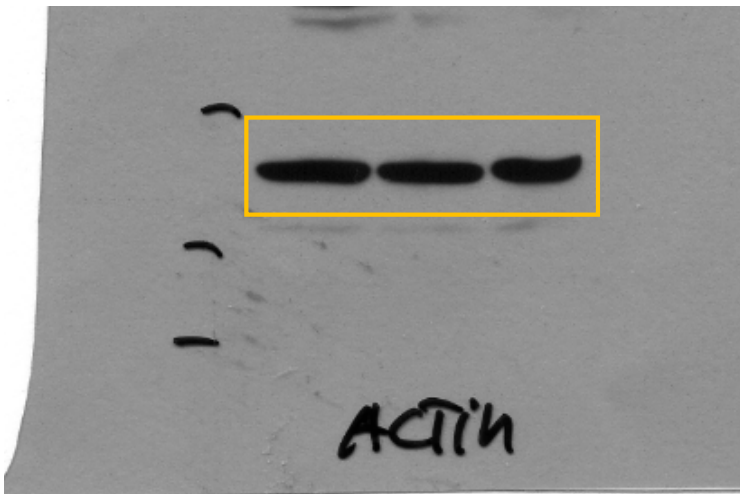



Figure 5E

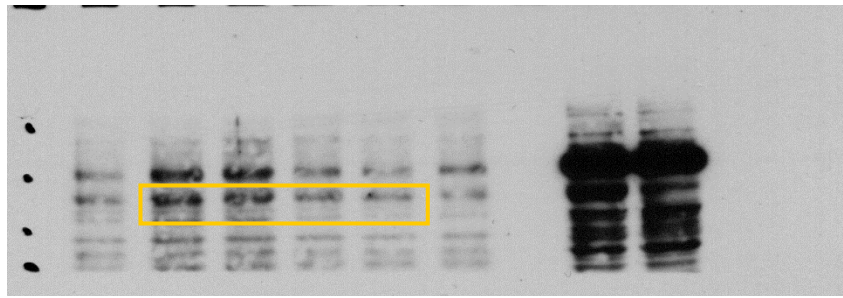

HOIP

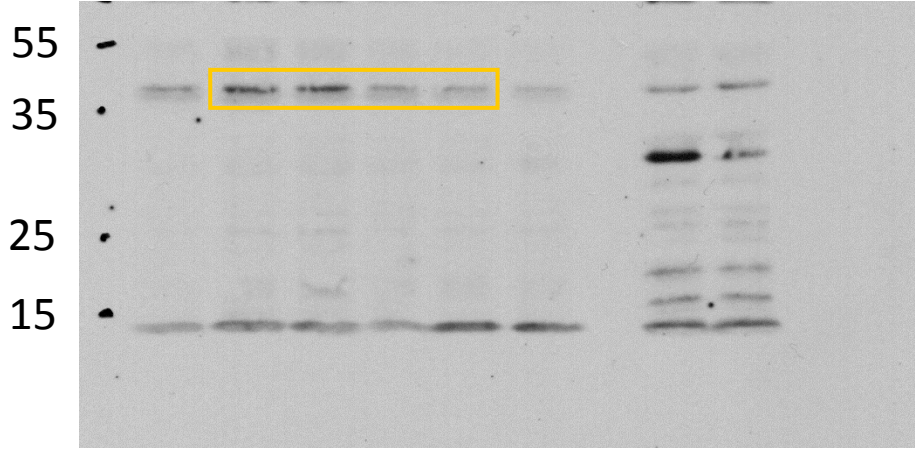

SHARPIN

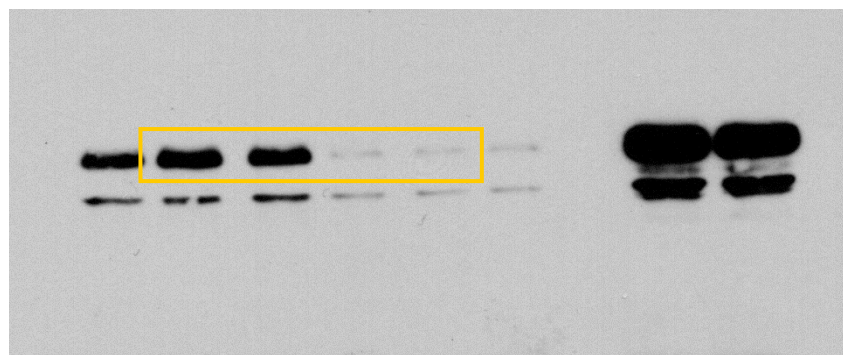

SP1

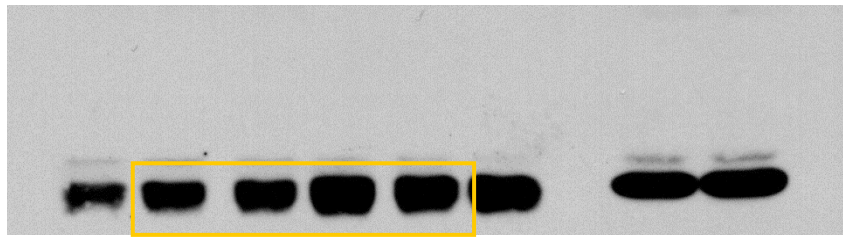

$\beta$ III-tubulin

Figure 5G

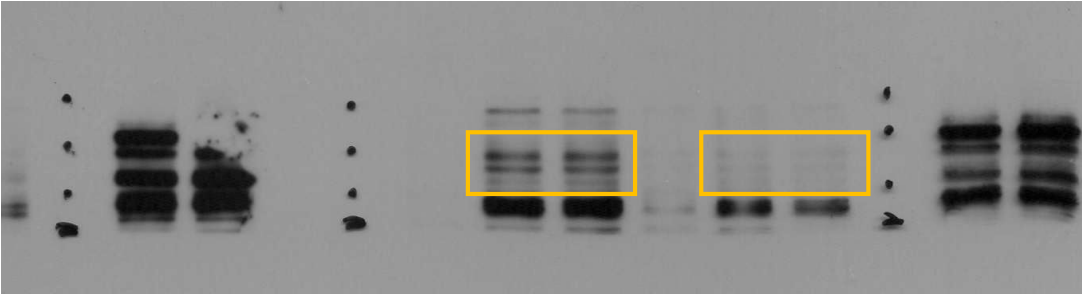

HOIP

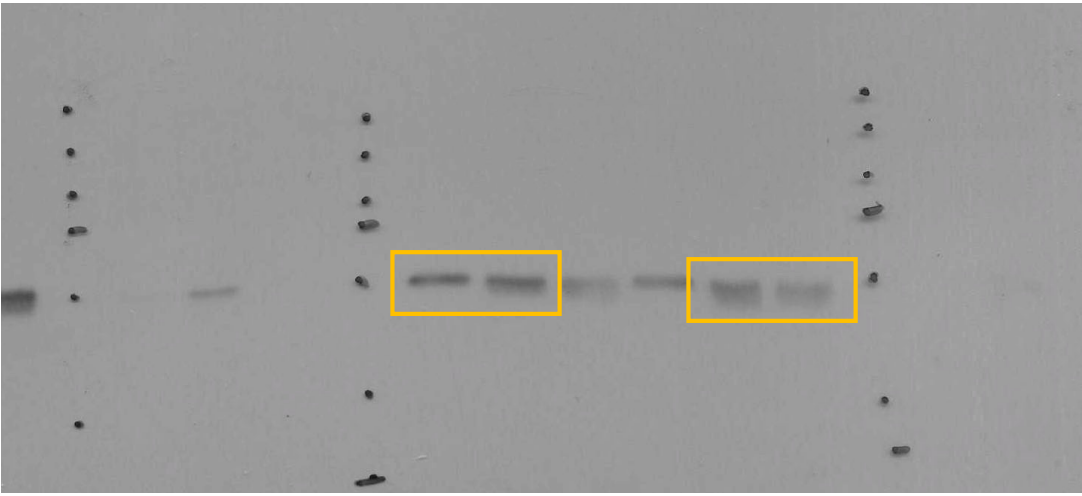

$\beta$ III-tubulin

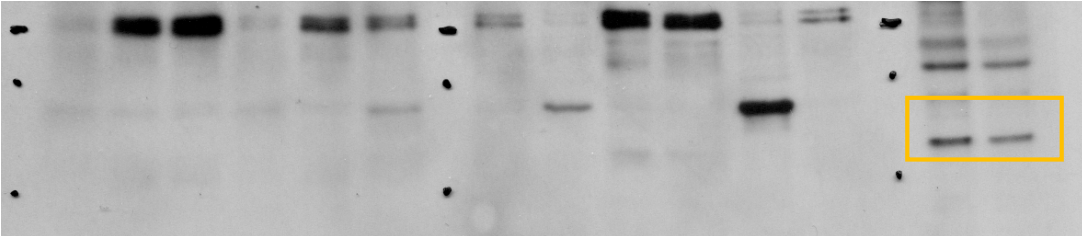

$\beta$ III-tubulin
