# Supplementary material
Source: PubMed Central journal article supplement (PMC6484417)

Figure 7A

HOIP

actin

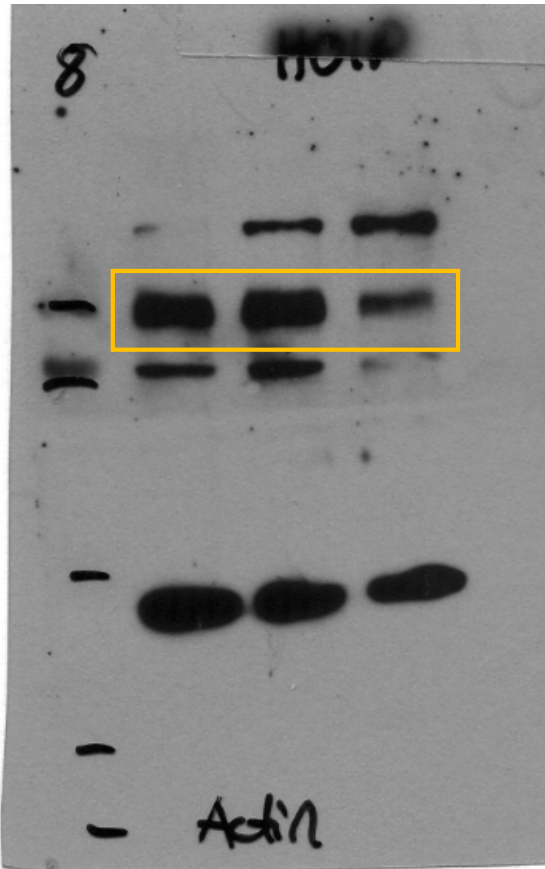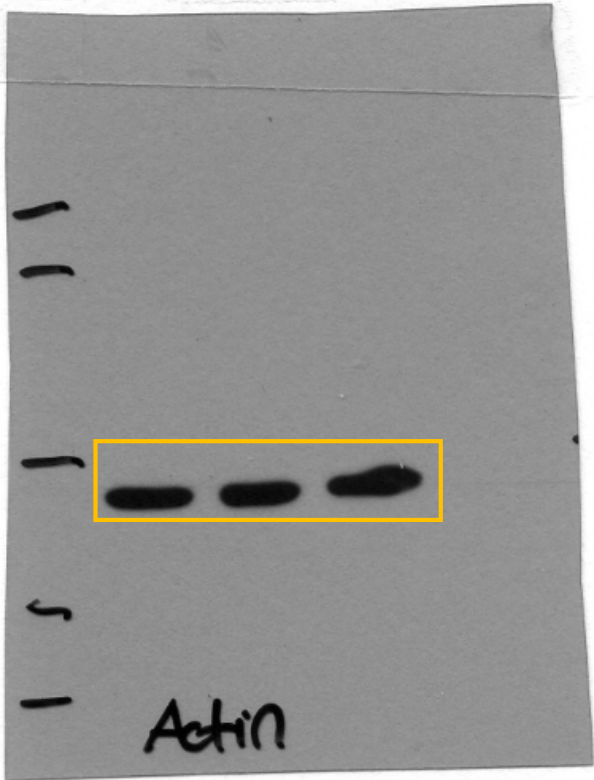

OTULIN

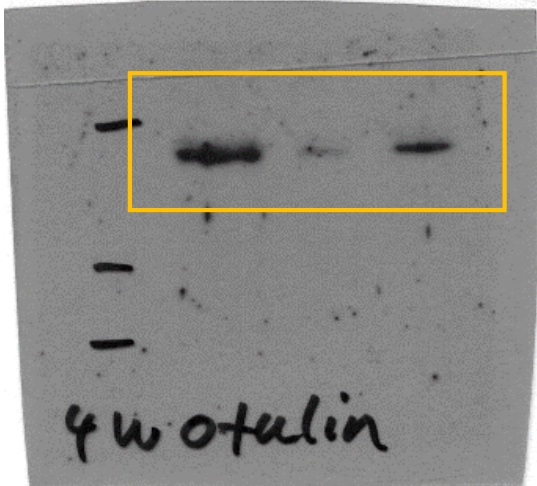

Figure 7B

HOIP

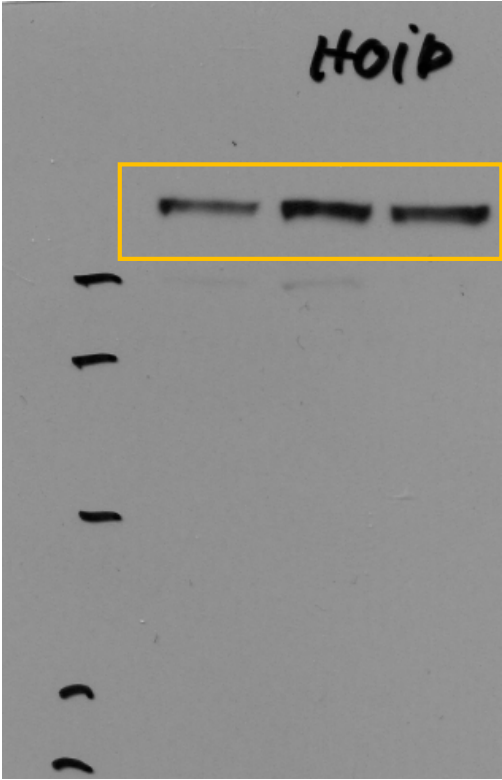

actin

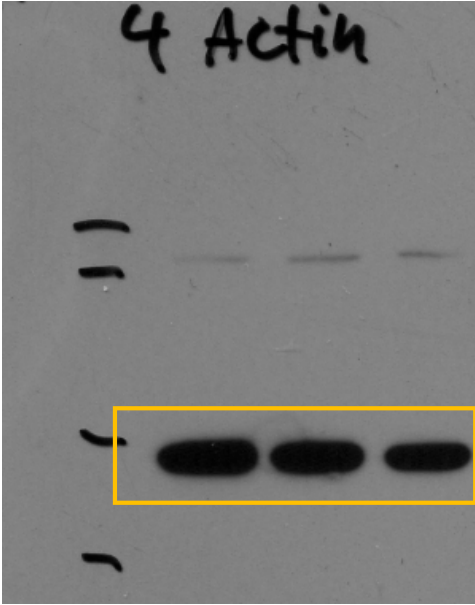

Figure 7C

HOIP

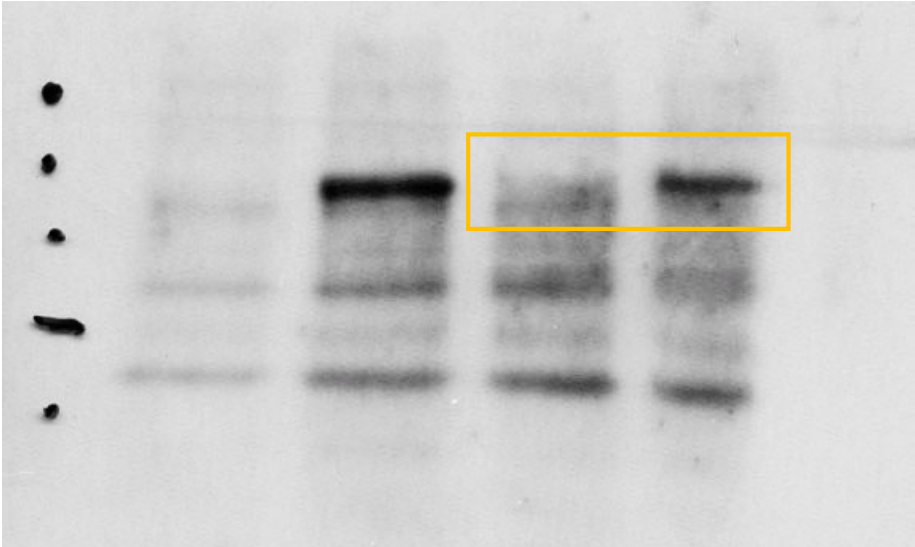

I $\kappa$ B-2S/A

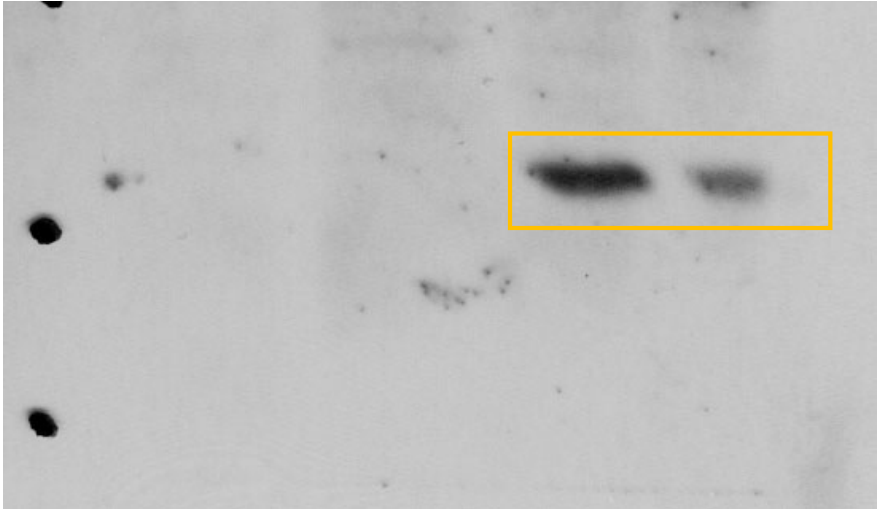

actin

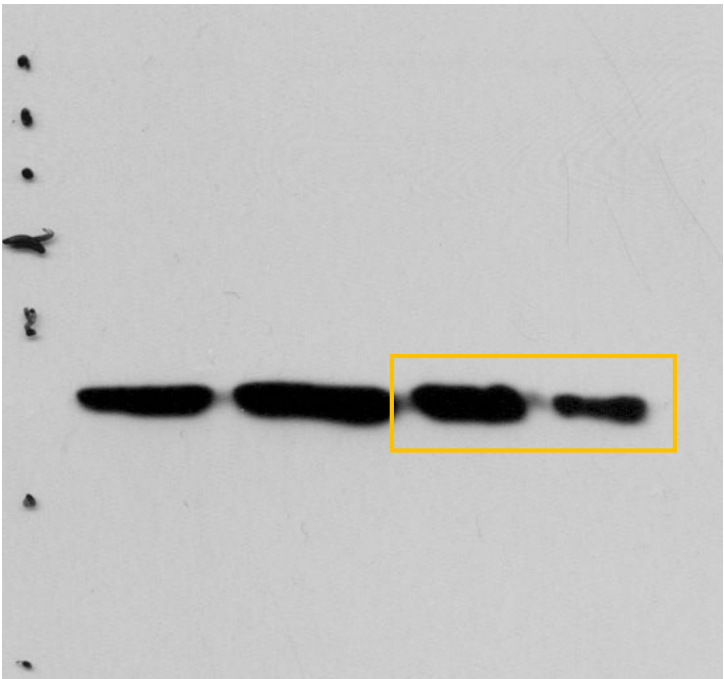

Figure 7E

HOIP

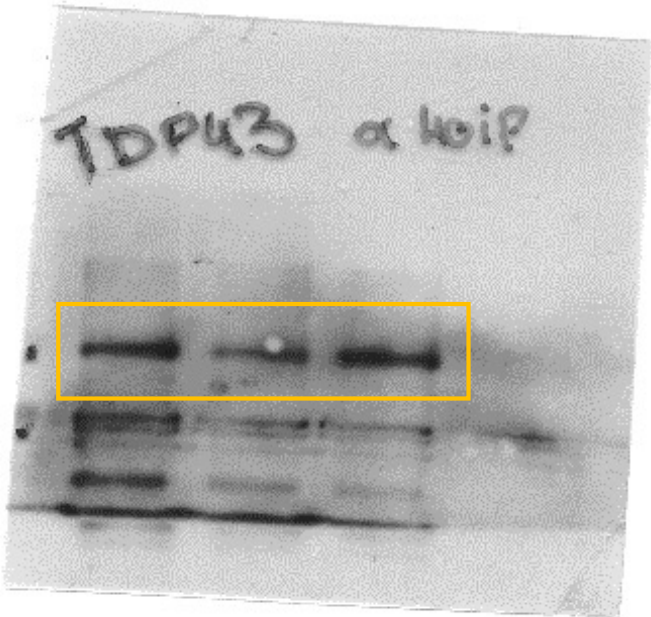

OTULIN

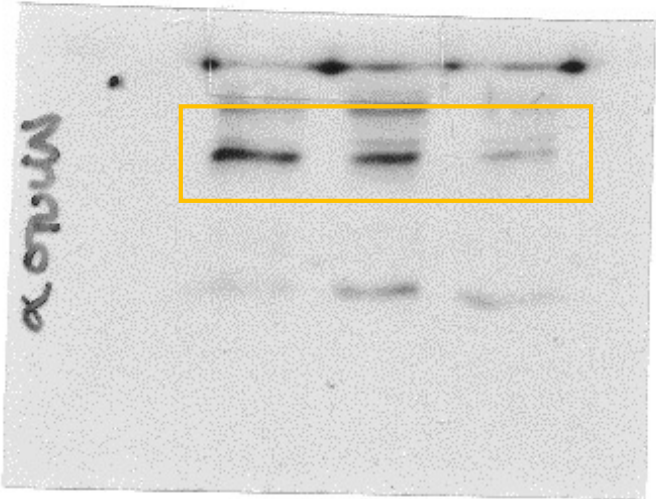

actin

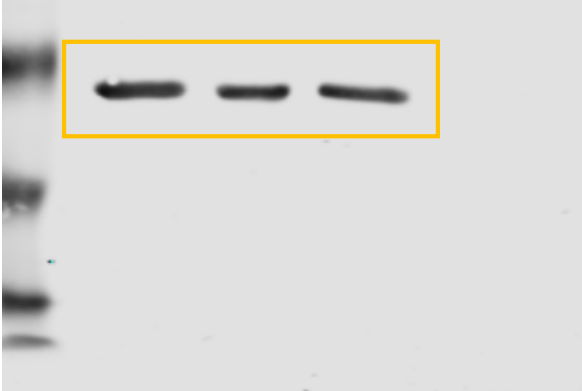

Supplement: EMBJ-38-e100730-s007.pdf [file EMBJ-38-e100730-s007.pdf]
