# Supplementary material
Source: PubMed Central journal article supplement (PMC6484417)

Figure 2D

M1-ubiquitin

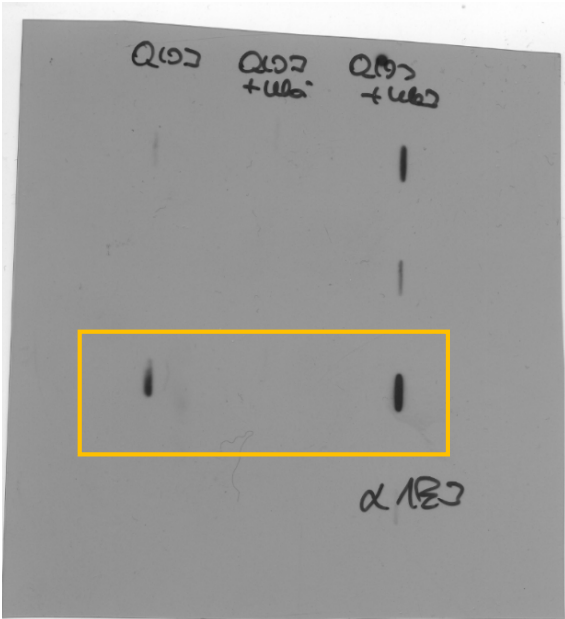

Ha-Htt

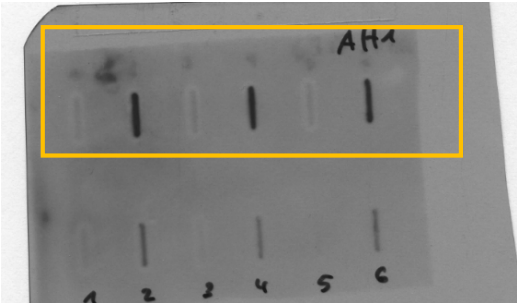

Supplement: EMBJ-38-e100730-s002.pdf [file EMBJ-38-e100730-s002.pdf]

Figure 3F

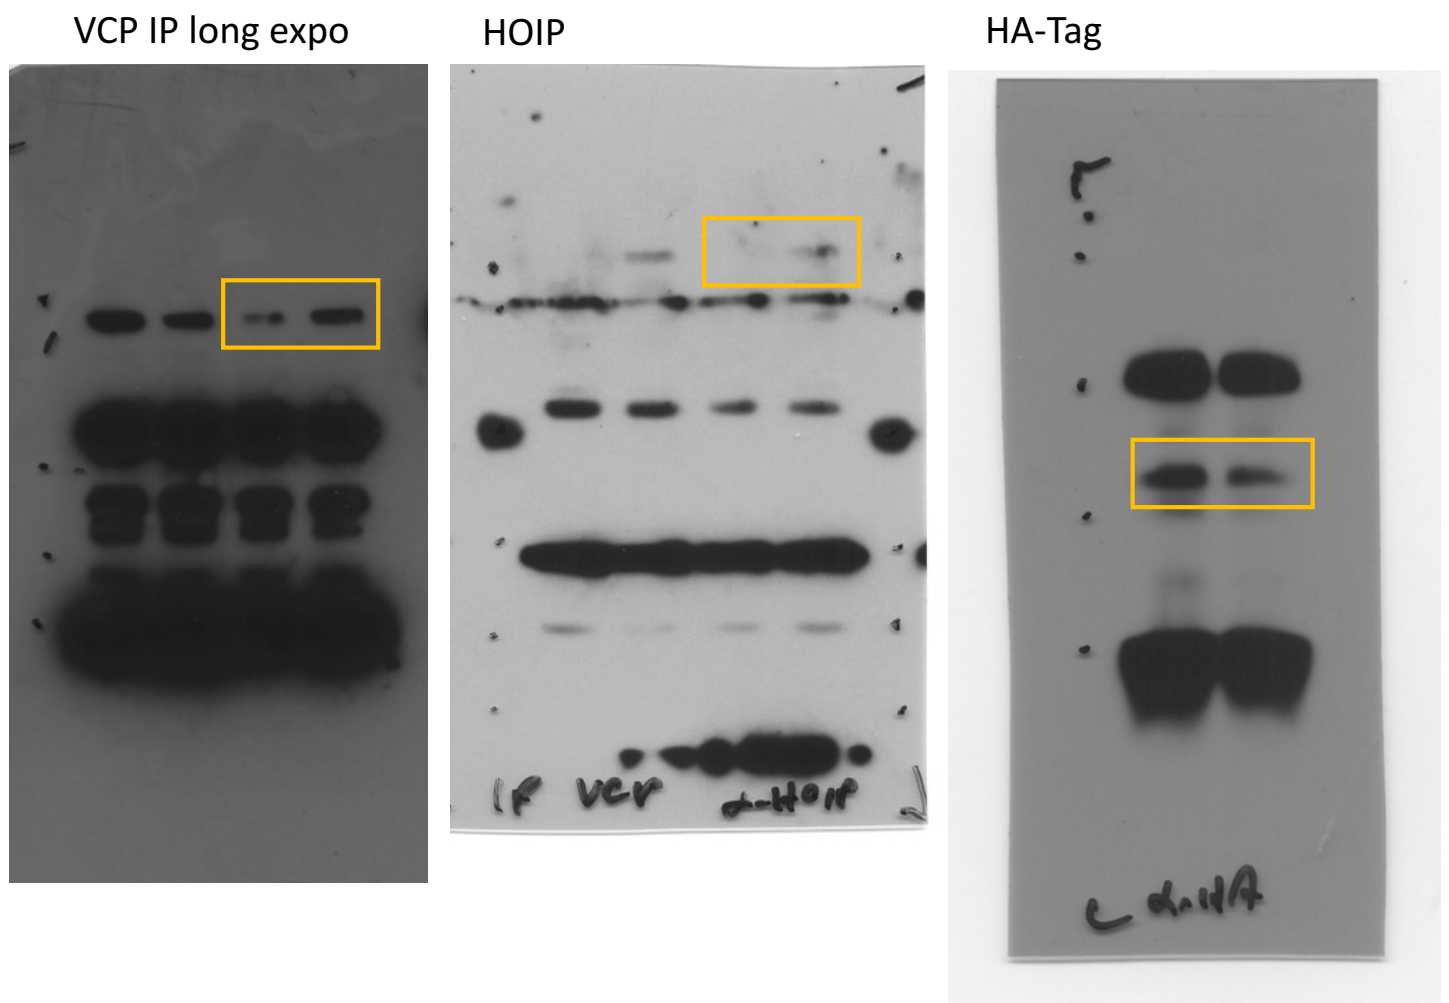

input

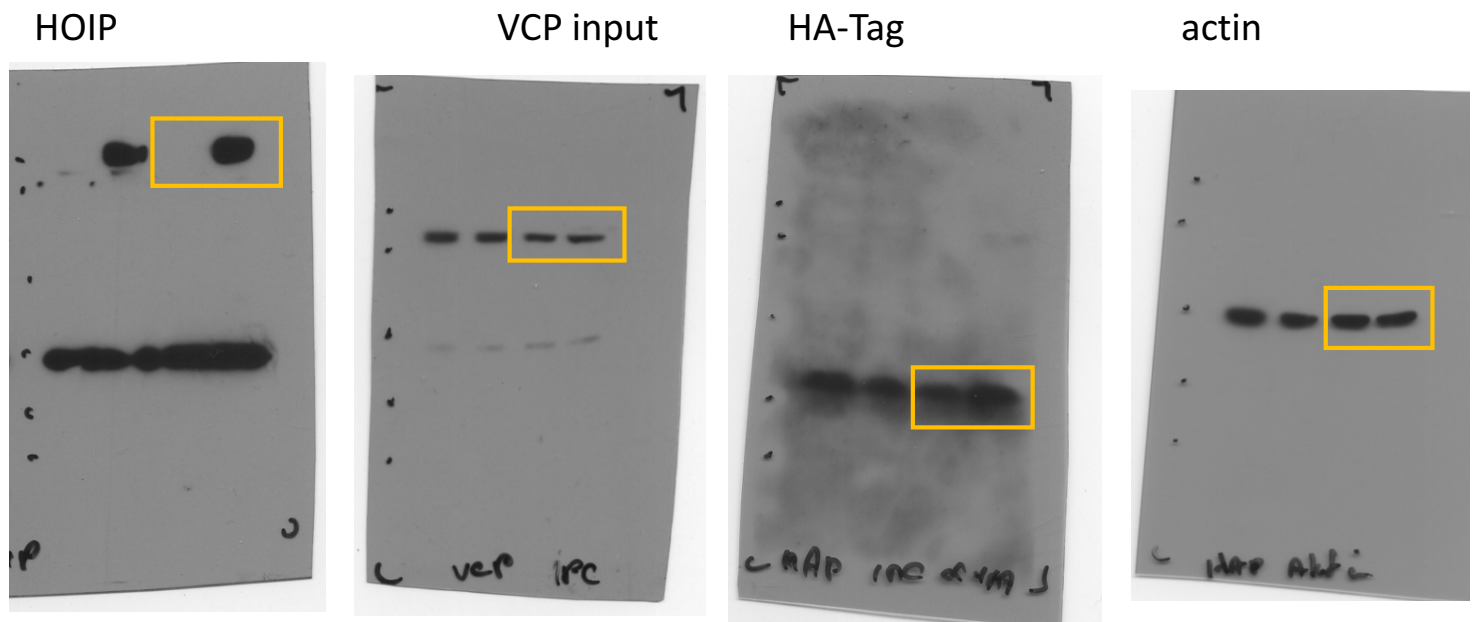

Supplement: EMBJ-38-e100730-s003.pdf [file EMBJ-38-e100730-s003.pdf]

Figure 4F

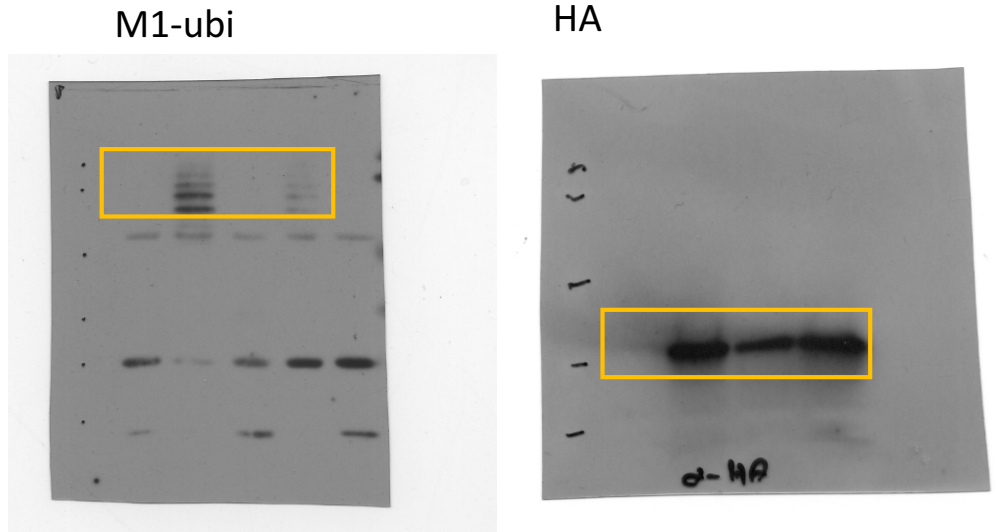

input

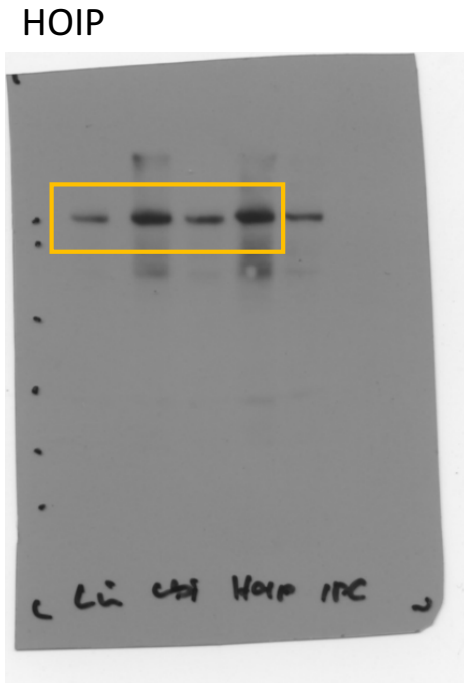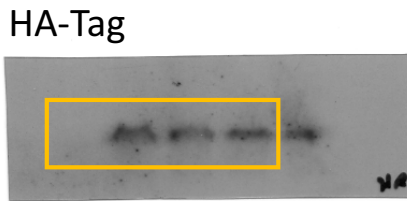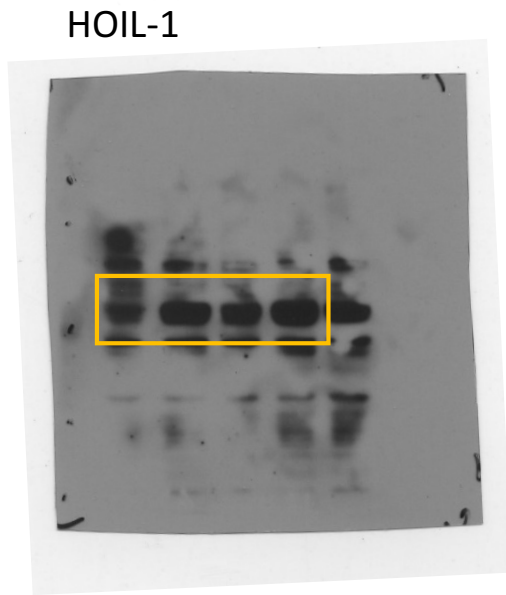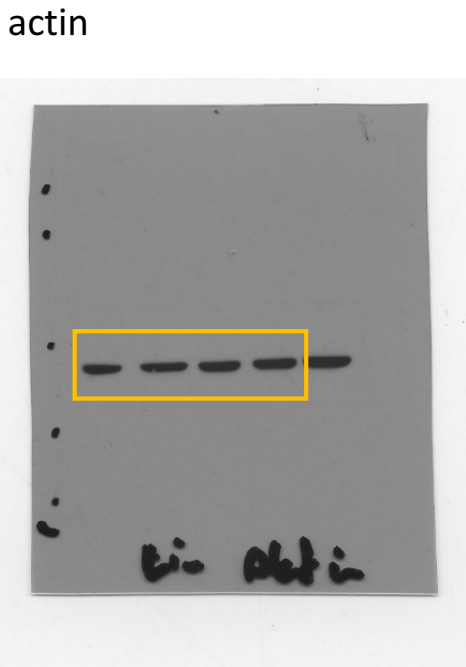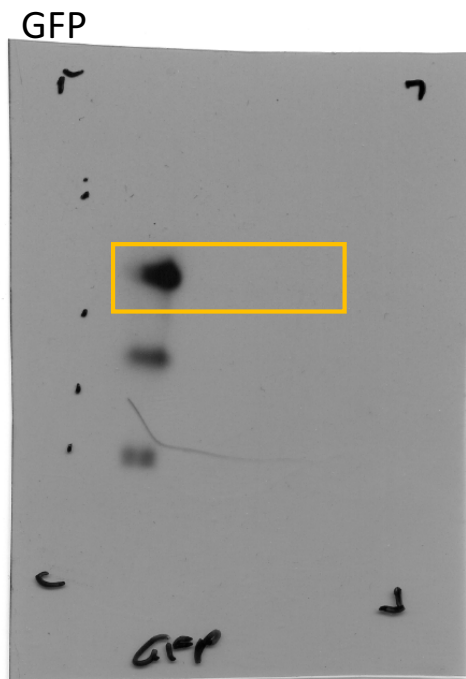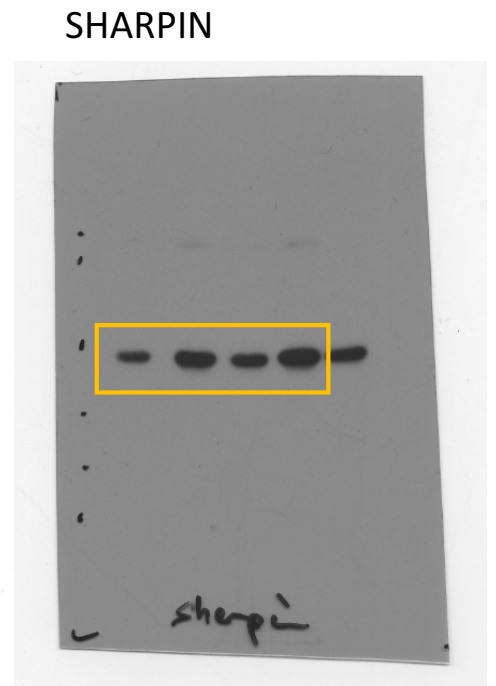

Figure 4G

M1-ubi

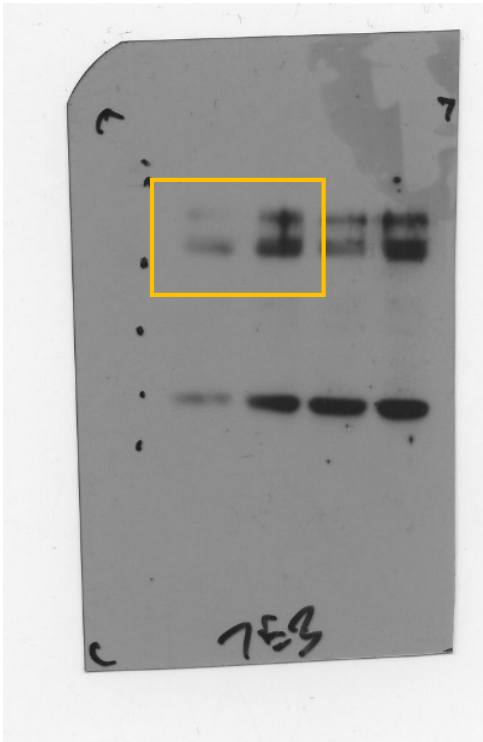

HA

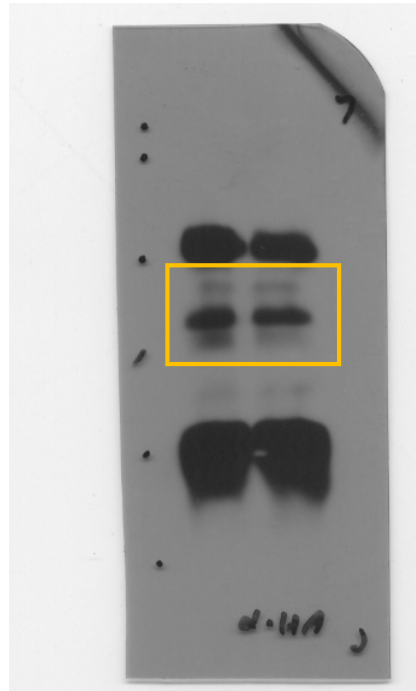

input

actin

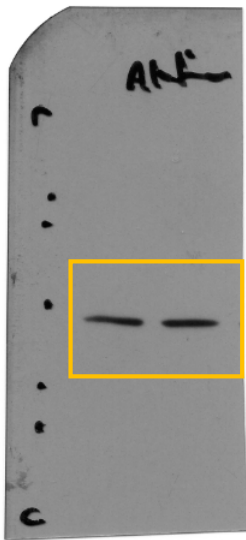

HA

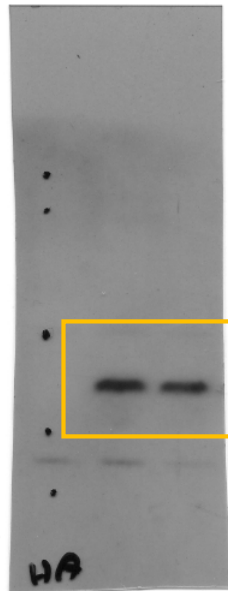

OTULIN

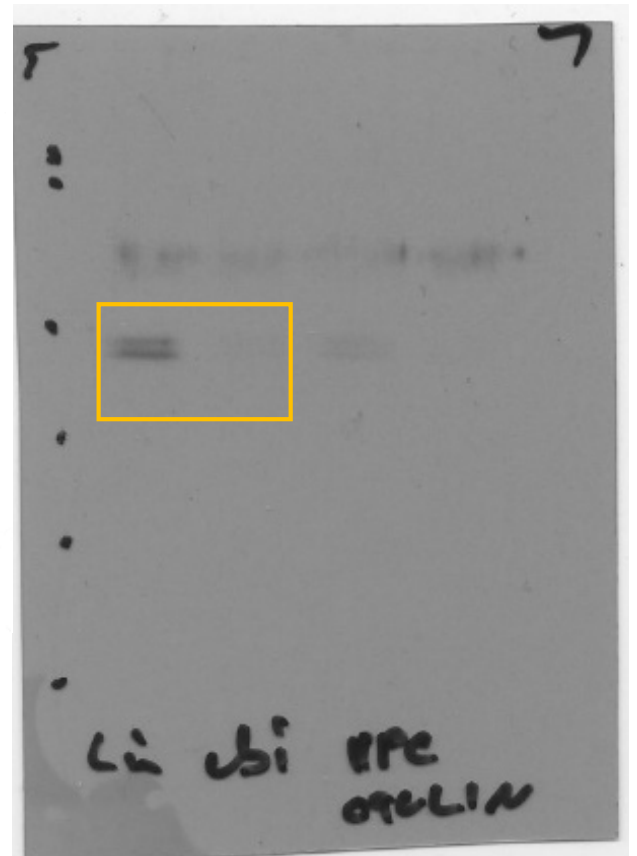

Figure 4H

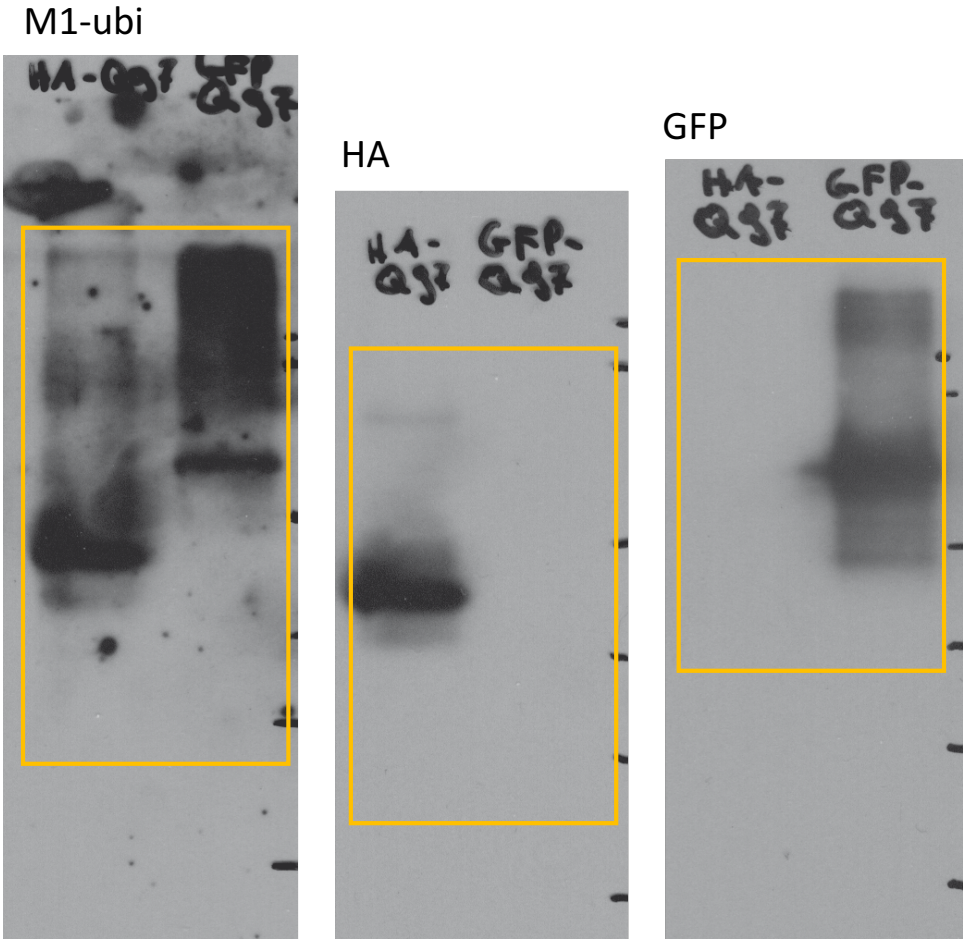

Supplement: EMBJ-38-e100730-s004.pdf [file EMBJ-38-e100730-s004.pdf]

# Figure 6D

M1-ubiquitin

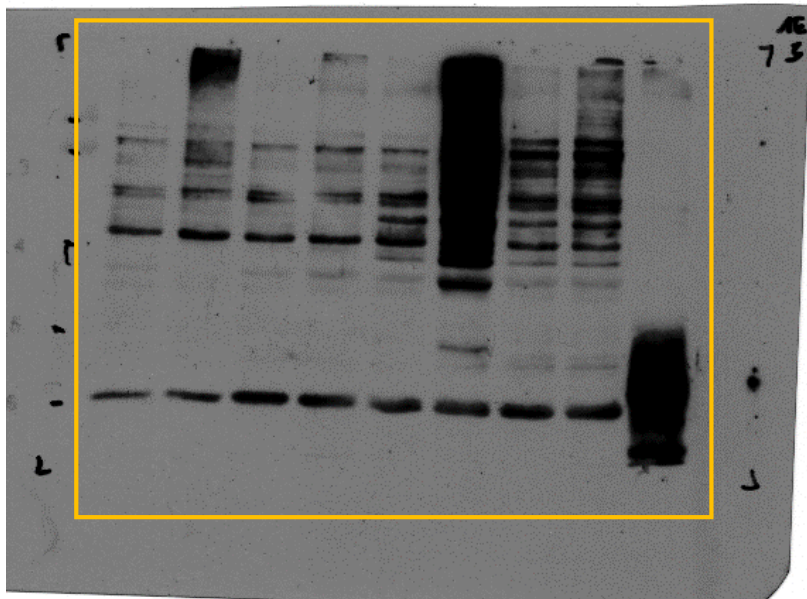

Actin

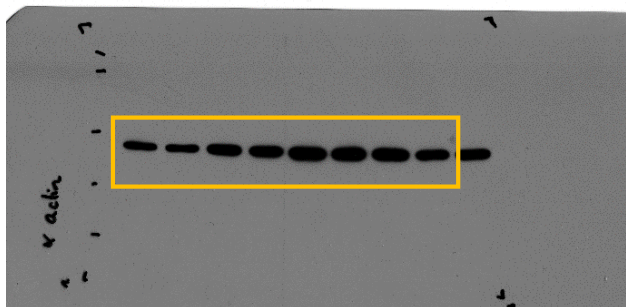

OTULIN

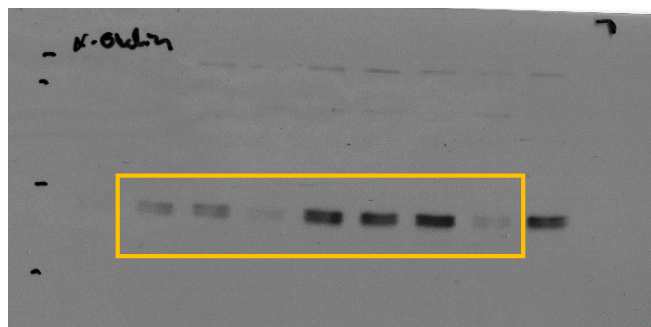

HOIP

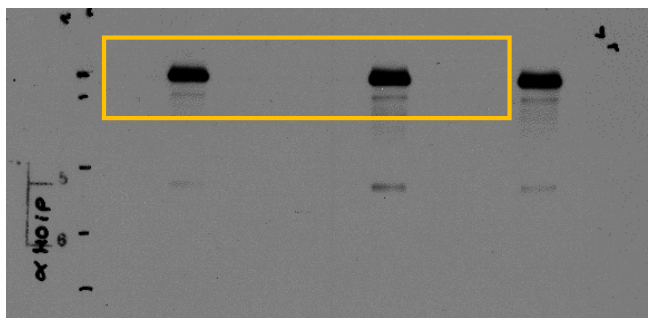

TDP43

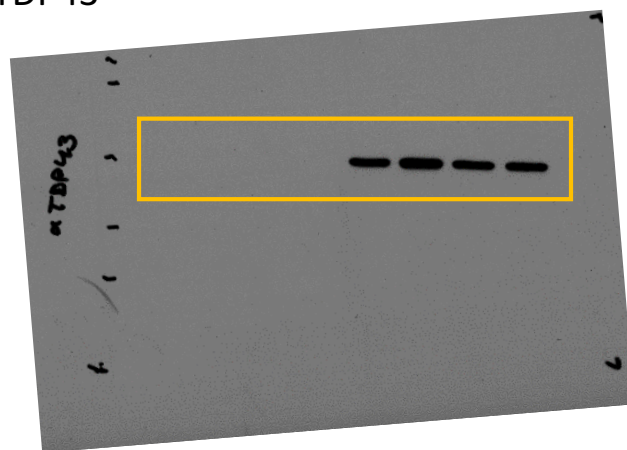

HOIL-1

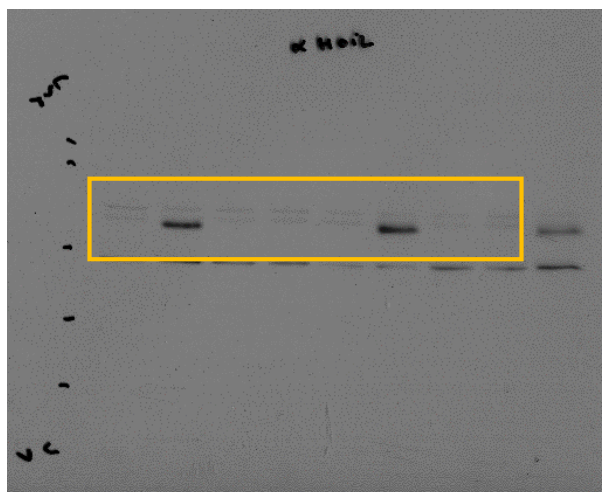

SHARPIN

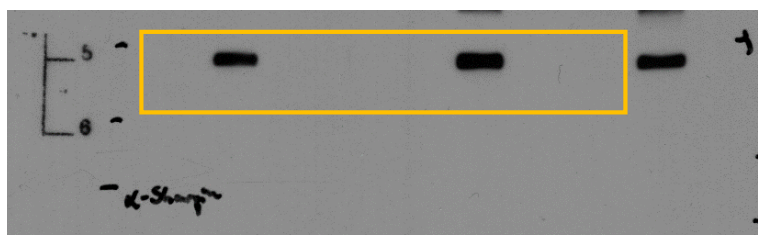

Supplement: EMBJ-38-e100730-s006.pdf [file EMBJ-38-e100730-s006.pdf]
